# Supplementary material
Source: publisher site journal article supplement (https://www.dovepress.com/article/supplementary_file/625578/625578%20Supplementary%20Table%201_1.docx)
Supplement: Supplementary file 1 [file 625578%20Supplementary%20Table%201_1.docx]

| **Thesaurus.** | |
| --- | --- |
| **label** | **replace by** |
| large language model | large language models |
| llms | large language models |
| llm | large language models |
| language model | large language models |
| language models | large language models |
| ai | artificial intelligence |
| artificial-intelligence | artificial intelligence |
| generative ai | artificial intelligence |
| generative artificial intelligence | artificial intelligence |
| artificial intelligence (ai) | artificial intelligence |
| large language models (llms) | large language models |
| exams | medical examination |
| examinations | medical examination |
| gpt | chatgpt |
| gpt-4 | chatgpt |
| gpt-4o | chatgpt |
| gpt-3.5 | chatgpt |
| nlp | natural language processing |
| chatbot | chatbots |
| education | medical education |
| students | medical students |
